# Supplementary material
Source: Royal Society of Chemistry journal article supplement (doi:10.1039/d6gc00055j)
Supplement: d6gc00055j1.pdf [file d6gc00055j1.pdf]

# **Sustainable conversion of lignocellulose hydrolysates without detoxification treatment to biodegradable poly (3-hydroxybutyrate) by a *Halomonas venusta* DSM4743 cell factory**

Yutian Zhang <sup>a,†</sup>, Fen Yin <sup>b,†</sup>, Yingying zheng<sup>a</sup>, Xiaojun Ma<sup>a,\*</sup>, Jianing Li <sup>c</sup>, Fumeng Yang<sup>a</sup>, Dongna Li<sup>a,\*</sup>, Yachao Li <sup>c</sup>

<sup>a</sup>State Key Laboratory of Bio-based Fiber Materials, Tianjin University of Science & Technology, Tianjin 300457, P.R. China

<sup>b</sup>Engineering College , Qinghai Institute of Technology, Xining 810016, P. R. China

<sup>c</sup>Rubber Research Institute, Chinese Academy of Tropical Agricultural Science, Haikou 571101, PR China

---

<sup>†</sup> These authors contributed equally to this work.

\* Corresponding author. *E-mail address*: mxj75@tust.edu.cn (X.J. Ma), hrilenary510@tust.edu.cn (D.N. Li).

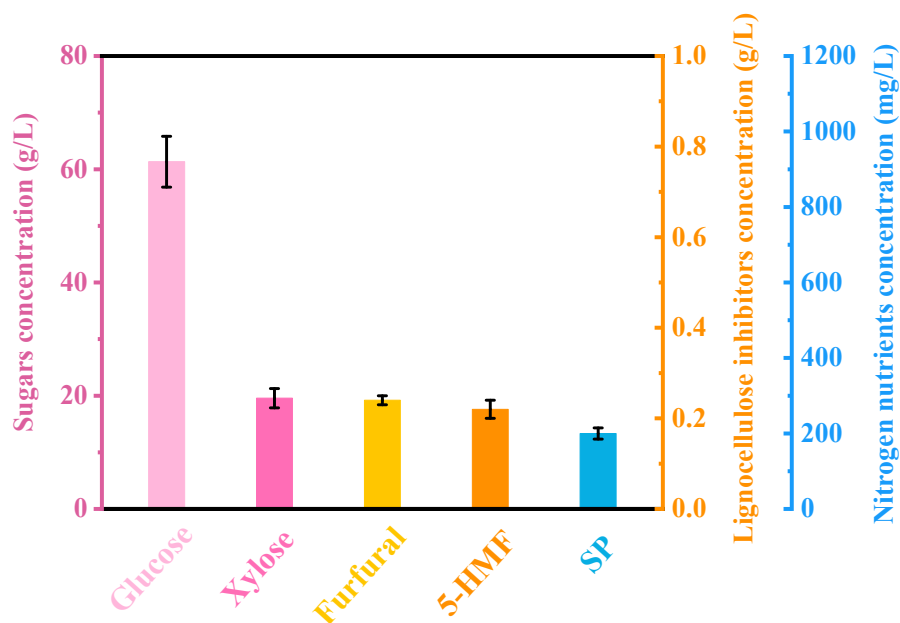

**Figure S1** Content of each component of rubberwood hydrolysates

**Table S1** Molecular weight and thermal property parameters of commercial and synthetic PHB

| Samples      | Mn (Da) | Mw (Da) | PDI  | Tdmax (°C) | Residual Mass (%) | Tg (°C) | Tc (°C) | Tm (°C) |
|--------------|---------|---------|------|------------|-------------------|---------|---------|---------|
| Standard PHB | 82529   | 166718  | 2.02 | 298.0      | 8.7               | —       | 83.1    | 174.2   |
| Sample PHB   | 70631   | 143954  | 2.04 | 264.8      | 13.9              | -25.84  | 58.7    | 164.4   |

**Table S2** Data sheet for the mechanical properties of the synthetic PHB film

| Substrates              | Tensile Strength (MPa) | Young's Modulus (GPa) | Elongation at break (%) | References |
|-------------------------|------------------------|-----------------------|-------------------------|------------|
| Rubberwood hydrolysates | 17.17                  | 3.47                  | 1.756                   | This Study |
| Glucose                 | 9.99                   | 1.28                  | 1.39                    | 1          |
| Glucose                 | 17.01                  | 1.05                  | 3.80                    | 2          |
| Cooking oil             | 8.90                   | 1.38                  | 13.40                   | 3          |
| Glucose                 | 9.98                   | —                     | 1.59                    | 4          |

## References

- 1 Cristea, M. Pustan, C. Birleanu, C. Dudescu, C. G. Floare, A.-M. Tripon and H. L. Banciu, *J. Polym. Environ.*, 2022, **30**, 424-430.
- 2 Lukasiewicz, P. Basnett, R. Nigmatullin, R. Matharu, J. C. Knowles and I. Roy, *Acta Biomater.*, 2018, **71**, 225-234.
- 3 Esmail, J. R. Pereira, C. Sevrin, C. Grandfils, U. D. Menda, E. Fortunato, A. Oliva and F. Freitas, *Life-Basel*, 2021, **11**, 935-951.
- 4 S. de Andrade, G. G. Fonseca, L. H. I. Mei and F. M. Fakhouri, *J. Appl. Polym. Sci.*, 2017, **134**, 1-8.
